# Supplementary material for: One- and Two-Year Effects of the Healthy Primary School of the Future on Children’s Dietary and Physical Activity Behaviours: A Quasi-Experimental Study
Source: PubMed Central journal article supplement (PMC6470547; doi:10.3390/nu11030689), 2019-03-22
Supplement: nutrients-11-00689-s001.pdf [file nutrients-11-00689-s001.pdf]

## Additional file

Additional table 1: Children's PA and dietary behaviours per item: descriptives and effect sizes

| Total score                              | Items                                        | N total | Full HPSF         |                | Partial HPSF      |                | Control           |                | Effect size        |                   |       |
|------------------------------------------|----------------------------------------------|---------|-------------------|----------------|-------------------|----------------|-------------------|----------------|--------------------|-------------------|-------|
|                                          |                                              |         | % / Mean<br>(±SD) | %<br>Imp.*     | % / Mean<br>(±SD) | %<br>Imp.*     | % / Mean<br>(±SD) | %<br>Imp.*     | HPSF vs<br>control | PAS vs<br>control |       |
| <b>Parent-reported</b>                   |                                              |         |                   |                |                   |                |                   |                |                    |                   |       |
| Total time spend on PA behaviours        | Active school transport (min/day)            | T0      | 740               | 8.76 (±10.30)  |                   | 8.68 (±11.33)  |                   | 11.36 (±14.58) |                    |                   |       |
|                                          |                                              | T1      | 701               | 8.57 (±9.65)   | 27.6              | 9.64 (±10.80)  | 30.1              | 12.03 (±13.14) | 36.1               | -0.07             | 0.03  |
|                                          |                                              | T2      | 632               | 10.79 (±11.81) | 37.4              | 9.95 (±14.32)  | 22.7              | 12.34 (±20.31) | 33.1               | 0.01              | 0.00  |
|                                          | Playing outside after school (min/day)       | T0      | 734               | 51.36 (±46.65) |                   | 45.88 (±41.90) |                   | 50.80 (±45.53) |                    |                   |       |
|                                          |                                              | T1      | 692               | 46.58 (±43.55) | 35.6              | 45.16 (±38.98) | 43.5              | 54.45 (±49.47) | 41.8               | -0.14             | -0.06 |
|                                          |                                              | T2      | 617               | 39.84 (±36.19) | 33.1              | 43.36 (±42.40) | 39.2              | 53.29 (±47.69) | 43.1               | -0.25             | -0.03 |
|                                          | Playing inside active after school (min/day) | T0      | 727               | 36.25 (±43.05) |                   | 34.83 (±37.75) |                   | 41.94 (±46.87) |                    |                   |       |
|                                          |                                              | T1      | 598               | 35.62 (±39.78) | 38.7              | 33.95 (±33.59) | 44.5              | 40.57 (±43.07) | 43.8               | 0.01              | 0.00  |
|                                          |                                              | T2      | 615               | 28.84 (±30.68) | 36.7              | 29.22 (±31.85) | 33.8              | 39.25 (±44.70) | 40.9               | -0.06             | -0.05 |
|                                          | Sports club (min/day)                        | T0      | 732               | 21.21 (±21.33) |                   | 18.33 (±17.48) |                   | 19.44 (±18.65) |                    |                   |       |
|                                          |                                              | T1      | 695               | 21.33 (±18.54) | 32.9              | 22.52 (±17.67) | 44.1              | 24.22 (±28.75) | 40.3               | -0.18             | -0.03 |
|                                          |                                              | T2      | 616               | 23.33 (±19.32) | 44.2              | 24.86 (±19.53) | 60.3              | 26.07 (±24.56) | 47.9               | -0.10             | 0.05  |
| Total time spend on sedentary behaviours | Watching TV (min/day)                        | T0      | 735               | 60.23 (±42.71) |                   | 62.98 (±41.09) |                   | 62.28 (±40.39) |                    |                   |       |
|                                          |                                              | T1      | 692               | 55.34 (±36.71) | 39.3              | 63.39 (±37.91) | 26.3              | 63.74 (±40.17) | 26.3               | -0.22             | -0.03 |
|                                          |                                              | T2      | 612               | 52.83 (±36.84) | 42.1              | 62.03 (±38.72) | 30.2              | 61.21 (±41.36) | 29.8               | -0.22             | -0.05 |
|                                          | Using computer (min/day)                     | T0      | 735               | 29.71 (±38.08) |                   | 26.65 (±35.92) |                   | 32.08 (±39.24) |                    |                   |       |
|                                          |                                              | T1      | 689               | 28.20 (±31.56) | 36.4              | 28.88 (±36.86) | 28.3              | 32.93 (±40.11) | 28.9               | -0.15             | -0.02 |
|                                          |                                              | T2      | 611               | 28.11 (±33.93) | 31.4              | 26.80 (±31.96) | 28.9              | 34.86 (±39.60) | 27.8               | -0.23             | -0.17 |
|                                          | Social media (min/day)                       | T0      | 726               | 1.53 (±10.74)  |                   | 1.65 (±8.02)   |                   | 3.92 (±21.40)  |                    |                   |       |
|                                          |                                              | T1      | 690               | 4.30 (±19.81)  | 4.9               | 3.33 (±13.43)  | 3.7               | 5.48 (±20.83)  | 5.9                | 0.05              | 0.03  |
|                                          |                                              | T2      | 604               | 3.46 (±11.92)  | 3.3               | 5.76 (±19.97)  | 1.6               | 5.96 (±19.58)  | 2.6                | -0.04             | 0.03  |
| Children's healthy dietary behaviours    | Breakfast (days/week)                        | T0      | 717               | 6.79 (±0.80)   |                   | 6.85 (±0.76)   |                   | 6.82 (±0.81)   |                    |                   |       |
|                                          |                                              | T1      | 688               | 6.85 (±0.75)   | 3.1               | 6.81 (±0.87)   | 2.4               | 6.76 (±1.00)   | 2.0                | 0.12              | 0.07  |
|                                          |                                              | T2      | 602               | 6.87 (±0.77)   | 5.0               | 6.87 (±0.85)   | 3.2               | 6.75 (±1.01)   | 1.8                | 0.19              | 0.10  |
|                                          | Fruit (days/week)                            | T0      | 715               | 5.57 (±1.59)   |                   | 5.40 (±1.66)   |                   | 4.99 (±1.86)   |                    |                   |       |
|                                          |                                              | T1      | 685               | 5.70 (±1.52)   | 28.1              | 5.47 (±1.81)   | 22.8              | 4.95 (±1.91)   | 25.3               | 0.12              | 0.09  |
|                                          |                                              | T2      | 593               | 5.60 (±1.51)   | 21.0              | 5.36 (±1.60)   | 28.2              | 4.98 (±1.87)   | 26.4               | -0.03             | -0.03 |
|                                          | Vegetables raw (days/week)                   | T0      | 715               | 3.67 (±2.22)   |                   | 3.53 (±2.18)   |                   | 3.36 (±2.14)   |                    |                   |       |
|                                          |                                              | T1      | 685               | 4.13 (±2.14)   | 48.1              | 3.97 (±2.04)   | 40.7              | 3.73 (±2.17)   | 38.0               | 0.06              | -0.03 |
|                                          |                                              | T2      | 593               | 4.16 (±2.12)   | 47.1              | 4.33 (±1.98)   | 46.8              | 3.86 (±2.16)   | 49.1               | -0.01             | 0.04  |
|                                          |                                              | T0      | 715               | 4.82 (±1.60)   |                   | 4.95 (±1.57)   |                   | 4.93 (±1.53)   |                    |                   |       |

|                                                  |                                           |      |              |              |                           |              |              |              |       |       |       |  |
|--------------------------------------------------|-------------------------------------------|------|--------------|--------------|---------------------------|--------------|--------------|--------------|-------|-------|-------|--|
| Children's<br>unhealthy<br>dietary<br>behaviours | Vegetables<br>cooked/baked<br>(days/week) | T1   | 685          | 4.91 (±1.61) | 31.3                      | 4.93 (±1.62) | 28.7         | 4.87 (±1.42) | 28.7  | 0.07  | 0.04  |  |
|                                                  |                                           | T2   | 593          | 4.94 (±1.59) | 39.5                      | 4.72 (±1.56) | 30.6         | 4.91 (±1.59) | 32.1  | 0.06  | -0.11 |  |
|                                                  |                                           |      |              |              |                           |              |              |              |       |       |       |  |
|                                                  | Water<br>(days/week)                      | T0   | 711          | 4.83 (±2.66) |                           | 5.16 (±2.35) |              | 4.61 (±2.77) |       |       |       |  |
|                                                  |                                           | T1   | 684          | 5.64 (±2.04) | 34.4                      | 5.81 (±2.07) | 28.3         | 4.97 (±2.60) | 26.0  | 0.21  | 0.10  |  |
|                                                  |                                           | T2   | 590          | 6.03 (±1.64) | 38.7                      | 5.52 (±2.19) | 30.9         | 5.10 (±2.49) | 29.2  | 0.36  | 0.02  |  |
|                                                  | Soft drinks<br>(days/week)                | T0   | 711          | 3.76 (±2.53) |                           | 3.83 (±2.59) |              | 4.07 (±2.63) |       |       |       |  |
|                                                  |                                           | T1   | 684          | 3.01 (±2.60) | 48.8                      | 3.30 (±2.73) | 42.8         | 3.73 (±2.70) | 34.0  | -0.19 | -0.10 |  |
|                                                  |                                           | T2   | 590          | 2.95 (±2.52) | 44.5                      | 3.48 (±2.70) | 41.5         | 3.31 (±2.54) | 40.6  | -0.11 | 0.06  |  |
|                                                  | Sport drinks<br>(days/week)               | T0   | 711          | 0.09 (±0.38) |                           | 0.09 (±0.37) |              | 0.12 (±0.48) |       |       |       |  |
| T1                                               |                                           | 684  | 0.08 (±0.38) | .6           | 0.09 (±0.37)              | .0           | 0.23 (±0.67) | .7           | -0.16 | -0.21 |       |  |
| T2                                               |                                           | 590  | 0.09 (±0.35) | .8           | 0.10 (±0.52)              | .0           | 0.13 (±0.48) | .0           | 0.02  | 0.00  |       |  |
| Energy drinks<br>(days/week) <sup>a</sup>        | T0                                        | 711  | 0.01 (±0.13) |              | 0.00 (±0.00)              |              | 0.01 (±0.14) |              |       |       |       |  |
|                                                  | T1                                        | 684  | 0.00 (±0.00) | 3.8          | 0.00 (±0.00)              | 6.0          | 0.02 (±0.27) | 2.0          |       |       |       |  |
|                                                  | T2                                        | 589  | 0.00 (±0.00) | 4.2          | 0.00 (±0.00)              | 4.9          | 0.00 (±0.07) | 4.7          |       |       |       |  |
| Chocolate<br>(days/week)                         | T0                                        | 704  | 0.83 (±1.45) |              | 0.76 (±1.46)              |              | 0.95 (±1.44) |              |       |       |       |  |
|                                                  | T1                                        | 679  | 0.75 (±1.36) | 21.3         | 0.77 (±1.44)              | 20.1         | 1.06 (±1.48) | 20.1         | -0.18 | -0.05 |       |  |
|                                                  | T2                                        | 586  | 0.97 (±1.56) | 21.8         | 0.96 (±1.46)              | 17.9         | 1.14 (±1.48) | 16.5         | -0.09 | 0.00  |       |  |
| Salted snacks<br>(days/week)                     | T0                                        | 704  | 1.33 (±1.28) |              | 1.24 (±1.04)              |              | 1.30 (±1.24) |              |       |       |       |  |
|                                                  | T1                                        | 679  | 1.36 (±1.13) | 25.0         | 1.29 (±1.24)              | 21.3         | 1.53 (±1.31) | 19.5         | -0.14 | -0.13 |       |  |
|                                                  | T2                                        | 586  | 1.44 (±1.40) | 24.4         | 1.38 (±1.16)              | 22.8         | 1.41 (±1.37) | 23.3         | -0.01 | 0.00  |       |  |
| Cookies (days/week)                              | T0                                        | 704  | 0.54 (±0.99) |              | 0.43 (±0.80)              |              | 0.73 (±1.30) |              |       |       |       |  |
|                                                  | T1                                        | 679  | 0.53 (±0.91) | 23.1         | 0.41 (±0.80)              | 20.7         | 0.58 (±0.96) | 22.1         | 0.17  | 0.14  |       |  |
|                                                  | T2                                        | 586  | 0.54 (±1.03) | 19.3         | 0.51 (±1.01) <sup>c</sup> | 19.5         | 0.51 (±0.79) | 24.3         | 0.24  | 0.29  |       |  |
| Soft ice-cream<br>(days/week)                    | T0                                        | 704  | 1.06 (±1.35) |              | 1.02 (±1.53)              |              | 1.08 (±1.35) |              |       |       |       |  |
|                                                  | T1                                        | 679  | 1.08 (±1.43) | 32.5         | 1.12 (±1.36)              | 28.7         | 1.20 (±1.48) | 28.2         | -0.15 | -0.08 |       |  |
|                                                  | T2                                        | 586  | 1.12 (±1.33) | 34.5         | 1.08 (±1.36)              | 27.6         | 1.40 (±1.87) | 22.3         | -0.23 | -0.26 |       |  |
| <b>Child-reported</b>                            |                                           |      |              |              |                           |              |              |              |       |       |       |  |
| Children's<br>healthy<br>dietary<br>behaviours   | Daily breakfast<br>(% yes) <sup>b</sup>   | T0   | 778          | 90.7         |                           | 90.1         |              | 90.0         |       |       |       |  |
|                                                  |                                           | T1   | 1015         | 93.3         | 5.0                       | 87.6         | 2.8          | 85.9         | 3.8   | 2.42  | 1.16  |  |
|                                                  |                                           | T2   | 1051         | 90.5         | 4.2                       | 88.9         | .7           | 84.1         | 4.9   | 1.76  | 1.30  |  |
|                                                  | Fruit intake<br>(0-3) <sup>c</sup>        | T0   | 745          | 2.18 (±0.89) |                           | 2.07 (±0.93) |              | 2.01 (±0.83) |       |       |       |  |
|                                                  |                                           | T1   | 993          | 2.09 (±0.86) | 22.4                      | 2.14 (±0.89) | 25.4         | 1.94 (±0.88) | 20.1  | -0.03 | 0.14  |  |
|                                                  |                                           | T2   | 1027         | 2.02 (±0.86) | 24.8                      | 2.06 (±0.93) | 30.8         | 1.99 (±0.87) | 23.5  | -0.16 | 0.03  |  |
|                                                  | Vegetables intake (0-3) <sup>c</sup>      | T0   | 687          | 2.22 (±0.85) |                           | 2.12 (±0.86) |              | 2.14 (±0.76) |       |       |       |  |
|                                                  |                                           | T1   | 940          | 2.13 (±0.87) | 21.6                      | 2.20 (±0.81) | 25.3         | 2.12 (±0.76) | 20.8  | -0.07 | 0.12  |  |
|                                                  |                                           | T2   | 962          | 2.21 (±0.85) | 35.0                      | 2.00 (±0.89) | 35.1         | 2.08 (±0.82) | 33.8  | 0.04  | -0.05 |  |
|                                                  | Water consumption<br>(0-3) <sup>c</sup>   | T0   | 774          | 2.07 (±0.92) |                           | 2.05 (±1.01) |              | 2.02 (±0.92) |       |       |       |  |
| T1                                               |                                           | 1015 | 2.10 (±0.97) | 29.1         | 2.07 (±1.02)              | 25.0         | 2.13 (±0.98) | 28.0         | -0.07 | -0.12 |       |  |
| T2                                               |                                           | 1045 | 2.14 (±1.00) | 35.2         | 2.15 (±0.98)              | 32.4         | 2.08 (±1.04) | 31.7         | 0.01  | 0.03  |       |  |
| Soft drinks<br>consumption (0-3) <sup>c</sup>    | T0                                        | 763  | 1.90 (±0.99) |              | 1.84 (±1.00)              |              | 1.92 (±0.92) |              |       |       |       |  |
|                                                  | T1                                        | 1006 | 1.69 (±0.94) | 34.7         | 1.48 (±1.01)              | 44.9         | 1.70 (±0.96) | 35.1         | 0.02  | -0.16 |       |  |

|                                                            |                                                            |    |      |              |      |              |      |              |      |       |       |
|------------------------------------------------------------|------------------------------------------------------------|----|------|--------------|------|--------------|------|--------------|------|-------|-------|
| <b>Children's<br/>unhealthy<br/>dietary<br/>behaviours</b> |                                                            | T2 | 1044 | 1.64 (±1.00) | 45.3 | 1.54 (±0.99) | 46.7 | 1.57 (±1.02) | 43.7 | 0.10  | 0.01  |
|                                                            | <b>Sport drinks<br/>consumption<br/>(0-3)<sup>c</sup></b>  | T0 | 774  | 0.96 (±0.98) |      | 0.81 (±0.92) |      | 0.91 (±0.93) |      |       |       |
|                                                            |                                                            | T1 | 1015 | 0.64 (±0.82) | 36.6 | 0.58 (±0.85) | 32.1 | 0.67 (±0.84) | 35.5 | -0.07 | -0.01 |
|                                                            |                                                            | T2 | 1047 | 0.59 (±0.89) | 42.6 | 0.50 (±0.78) | 42.4 | 0.66 (±0.89) | 40.5 | -0.12 | -0.13 |
|                                                            | <b>Energy drinks<br/>consumption<br/>(0-3)<sup>c</sup></b> | T0 | 771  | 0.27 (±0.64) |      | 0.38 (±0.80) |      | 0.28 (±0.69) |      |       |       |
|                                                            |                                                            | T1 | 1011 | 0.23 (±0.59) | 10.9 | 0.15 (±0.49) | 18.0 | 0.14 (±0.43) | 14.6 | 0.15  | -0.25 |
|                                                            |                                                            | T2 | 1045 | 0.25 (±0.68) | 14.1 | 0.13 (±0.48) | 22.9 | 0.23 (±0.64) | 14.2 | -0.02 | -0.50 |
|                                                            | <b>Chocolate intake<br/>(0-3)<sup>c</sup></b>              | T0 | 776  | 1.26 (±0.90) |      | 1.19 (±0.92) |      | 1.30 (±0.86) |      |       |       |
|                                                            |                                                            | T1 | 1013 | 1.17 (±0.94) | 31.9 | 0.95 (±0.95) | 41.5 | 1.07 (±0.91) | 37.4 | 0.19  | -0.07 |
|                                                            |                                                            | T2 | 1045 | 1.27 (±0.95) | 32.2 | 0.98 (±0.92) | 55.0 | 1.08 (±0.94) | 43.0 | 0.24  | -0.13 |
|                                                            | <b>Salted snacks intake<br/>(0-3)<sup>c</sup></b>          | T0 | 772  | 1.18 (±0.83) |      | 1.15 (±0.86) |      | 1.21 (±0.81) |      |       |       |
|                                                            |                                                            | T1 | 1019 | 1.07 (±0.89) | 34.0 | 0.92 (±0.81) | 40.1 | 0.99 (±0.82) | 37.1 | 0.15  | -0.02 |
|                                                            |                                                            | T2 | 1046 | 1.07 (±0.91) | 40.1 | 0.89 (±0.82) | 54.3 | 1.10 (±0.89) | 41.0 | 0.00  | -0.27 |
|                                                            | <b>Cookies intake<br/>(0-3)<sup>c</sup></b>                | T0 | 773  | 0.99 (±0.76) |      | 0.97 (±0.82) |      | 1.09 (±0.79) |      |       |       |
|                                                            |                                                            | T1 | 1019 | 0.80 (±0.84) | 38.2 | 0.67 (±0.78) | 42.1 | 0.77 (±0.79) | 45.3 | 0.18  | 0.01  |
|                                                            |                                                            | T2 | 1045 | 0.86 (±0.85) | 47.9 | 0.68 (±0.81) | 53.2 | 0.81 (±0.86) | 55.0 | 0.21  | -0.05 |
|                                                            | <b>Soft ice-cream<br/>intake<br/>(0-3)<sup>c</sup></b>     | T0 | 776  | 1.35 (±0.85) |      | 1.42 (±0.91) |      | 1.49 (±0.86) |      |       |       |
|                                                            |                                                            | T1 | 1017 | 1.40 (±0.97) | 31.1 | 1.21 (±0.91) | 41.9 | 1.31 (±0.92) | 38.4 | 0.27  | -0.06 |
|                                                            |                                                            | T2 | 1045 | 1.34 (±0.91) | 36.1 | 1.14 (±0.91) | 50.7 | 1.30 (±0.95) | 42.1 | 0.22  | -0.16 |

\* Improved: Percentage of children who improved, i.e., changed in a favorable direction, compared with their baseline score.

<sup>a</sup> No variation in variable; effect sizes could not be conducted.

<sup>b</sup> Effect size is odds ratio.

<sup>c</sup> Range: 0 (never) to 3 (every day).

**Additional table 2: Lunch food type combinations**

|                                              |    | N<br>total | Full HPSF |         | Partial HPSF |         | Control |         | Effect size             |                            |
|----------------------------------------------|----|------------|-----------|---------|--------------|---------|---------|---------|-------------------------|----------------------------|
|                                              |    |            | %         | % Imp.* | %            | % Imp.* | %       | % Imp.* | Full HPSF<br>vs control | Partial HPSF<br>vs control |
| <b>Child-reported</b>                        |    |            |           |         |              |         |         |         |                         |                            |
| <b>Grains <sup>a</sup> and fruit (% yes)</b> | T0 | 854        | 35.2      |         | 35.3         |         | 25.9    |         |                         |                            |
|                                              | T1 | 1201       | 57.9      | 37.1    | 31.8         | 12.0    | 27.9    | 15.5    | 2.31                    | 0.75                       |
|                                              | T2 | 1143       | 49.6      | 30.2    | 39.0         | 20.2    | 31.3    | 21.6    | 1.37                    | 0.85                       |
| <b>Grains and vegetables (% yes)</b>         | T0 | 853        | 23.2      |         | 23.0         |         | 14.2    |         |                         |                            |
|                                              | T1 | 1201       | 49.4      | 41.6    | 17.5         | 8.1     | 18.6    | 13.4    | 2.48                    | 0.49                       |
|                                              | T2 | 1138       | 60.2      | 44.2    | 19.1         | 13.9    | 20.8    | 17.4    | 3.57                    | 0.50                       |
| <b>Dairy <sup>b</sup> and fruit (% yes)</b>  | T0 | 841        | 14.2      |         | 18.6         |         | 12.4    |         |                         |                            |
|                                              | T1 | 1193       | 46.5      | 38.7    | 13.3         | 8.6     | 15.9    | 12.0    | 4.00                    | 0.47                       |
|                                              | T2 | 1144       | 40.1      | 27.5    | 13.8         | 9.6     | 16.2    | 14.6    | 2.98                    | 0.48                       |
| <b>Dairy and vegetables (% yes)</b>          | T0 | 845        | 10.7      |         | 11.4         |         | 8.7     |         |                         |                            |
|                                              | T1 | 1197       | 38.5      | 34.0    | 7.2          | 4.7     | 10.6    | 8.4     | 4.31                    | 0.47                       |
|                                              | T2 | 1144       | 47.1      | 39.6    | 7.7          | 5.9     | 11.5    | 8.7     | 5.75                    | 0.46                       |
| <b>Grains and dairy (% yes)</b>              | T0 | 845        | 34.4      |         | 38.1         |         | 32.2    |         |                         |                            |
|                                              | T1 | 1199       | 69.5      | 40.5    | 28.9         | 11.6    | 37.1    | 21.3    | 3.34                    | 0.51                       |
|                                              | T2 | 1139       | 68.0      | 41.3    | 25.8         | 10.8    | 37.1    | 23.4    | 3.14                    | 0.42                       |

\* Improved: Percentage of children who improved, i.e., changed in a favorable direction, compared with their baseline score.

<sup>a</sup> Grains: bread and cereals

<sup>b</sup> Dairy: milk, yoghurt, and cheese
